# Supplementary material
Source: PubMed Central journal article supplement (PMC9673482)
Supplement: NIHMS1846180-supplement-supp.pdf [file NIHMS1846180-supplement-supp.pdf]

1 **Supplementary Material: A Quantitative**  
2 *Characterization of the Spatial Distribution of Brain*  
3 *Metastases from Breast Cancer and Respective Molecular*  
4 *Subtypes*

5 **Saeedeh Mahmoodifar, M.S.,<sup>3</sup> Dhiraj J. Pangal, B.S.,<sup>1</sup> Tyler Cardinal,**  
6 **B.S.,<sup>1</sup> David Craig, Ph.D.,<sup>4</sup> Thomas Simon, Ph.D.,<sup>4</sup> Ben Yi Tew,**  
7 **Ph.D.,<sup>4</sup> Wensha Yang, Ph.D.,<sup>6</sup> Eric Chang, M.D.,<sup>6</sup> Min Yu, Ph.D.,<sup>6</sup>**  
8 **Josh Neman, Ph.D.,<sup>1</sup> Jeremy Mason, Ph.D.,<sup>5</sup> Arthur Toga, Ph.D.,<sup>6</sup>**  
9 **Bodour Salhia, Ph.D.,<sup>4</sup> Gabriel Zada, M.D., M.S.,<sup>1</sup> and Paul K.**  
10 **Newton, Ph.D.<sup>2,\*</sup>**

11 <sup>1</sup>*Department of Neurosurgery Keck School of Medicine of University of Southern California 1300 N. State*  
12 *Street, Suite 3300 Los Angeles, CA 90033*

13 <sup>2</sup>*Department of Aerospace and Mechanical Engineering, Mathematics and The Ellison Institute for*  
14 *Transformative Medicine of University of Southern California*

15 *Viterbi School of Engineering of University of Southern California 854 Downey Way Los Angeles, CA 90089*

16 <sup>3</sup>*Department of Physics Astronomy of University of Southern California Los Angeles, CA 90089*

17 <sup>4</sup>*Department of Translational Genomics Keck School of Medicine of University of Southern California 1450*  
18 *Biggy Street Los Angeles, CA 90033*

19 <sup>5</sup>*Convergent Science Institute in Cancer, Michelson Center for Convergent Bioscience of University of*  
20 *Southern California, Los Angeles, CA 90089*

21 *Catherine Joseph Aresty Department of Urology, Institute of Urology, Keck School of Medicine of*  
22 *University of Southern California, Los Angeles, CA 90033*

23 <sup>6</sup>*Keck School of Medicine of University of Southern California, Los Angeles, CA 90033*

24 *\*newton@usc.edu*

25 **Disclosure:** The authors have no conflicts of interest to disclose.

26 **Abstract**

27 **Purpose:** Brain metastases (BM) remain a significant cause of morbidity and mortality in breast  
28 cancer (BC) patients. Specific factors promoting the process of BM and predilection for selected  
29 neuro-anatomical regions remain unknown, yet may have major implications for prevention  
30 or treatment. Anatomical spatial distributions of BM from BC suggest a predominance of  
31 metastases in the hindbrain and cerebellum. Systematic approaches to quantifying BM location  
32 or location-based analyses based on molecular subtypes, however, remain largely unavailable.

33 **Methods:** We analyzed stereotactic Cartesian coordinates derived from 134 patients undergoing  
34 gamma- knife radiosurgery (GKRS) for treatment of 407 breast cancer BMs to quantitatively  
35 study BM spatial distribution along principal component axes and by intrinsic molecular subtype  
36 (ER,PR,Herceptin). We used kernel density estimators (KDE) to highlight clustering and  
37 distribution regions in the brain, and we used the metric of mutual information (MI) to tease out  
38 subtle differences in the BM distributions associated with different molecular subtypes of BC.  
39 BM location maps according to vascular and anatomical distributions using Cartesian coordinates  
40 to aid in systematic classification of tumor locations were additionally developed.

41 **Results:** We corroborated that BC BMs show a consistent propensity to arise posteriorly and  
42 caudally, and that Her2+ tumors are relatively more likely to arise medially rather than laterally.  
43 To compare the distributions among varying BC molecular subtypes, the mutual information  
44 metric reveal that the ER-PR-Her2+ and ER-PR-Her2- subtypes show the smallest amount of  
45 mutual information and are most molecularly distinct. The kernel density contour plots show a  
46 propensity for triple negative BC to arise in more superiorly or cranially situated BMs.

47 **Conclusions:** We present a novel and shareable workflow for characterizing and comparing

48 spatial distributions of BM which may aid in identifying therapeutic or diagnostic targets and  
49 interactions with the tumor microenvironment. Further characterization of these patterns with  
50 larger multi-institutional data-sets may have major impacts on treatment or management of cancer  
51 patients.

52 **Supplementary Material**

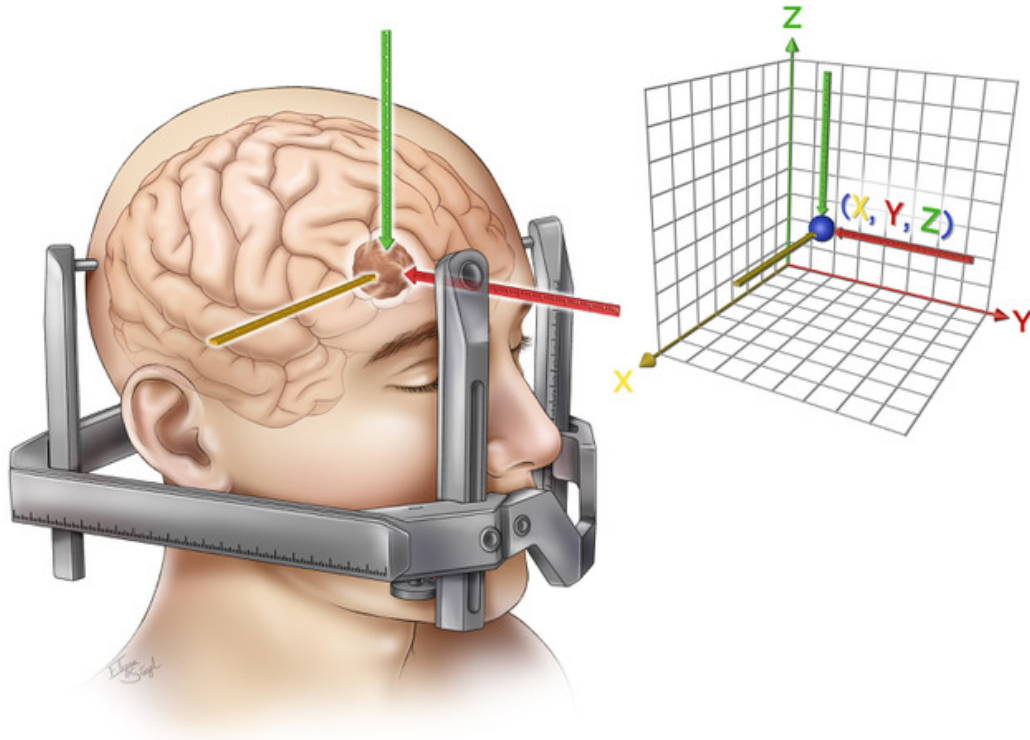

Fig. S1. Schematic illustration of Gamma Knife radiosurgery (GKRS) stereotactic headset, intracranial metastasis (brown), and targeted radiation location in X (yellow), Y (Red) and Z (Green) planes. These coordinates are subsequently mapped to a traditional three dimensional cartesian plane (right), and repeated for all brain metastases for all patients undergoing GKRS at our institution.

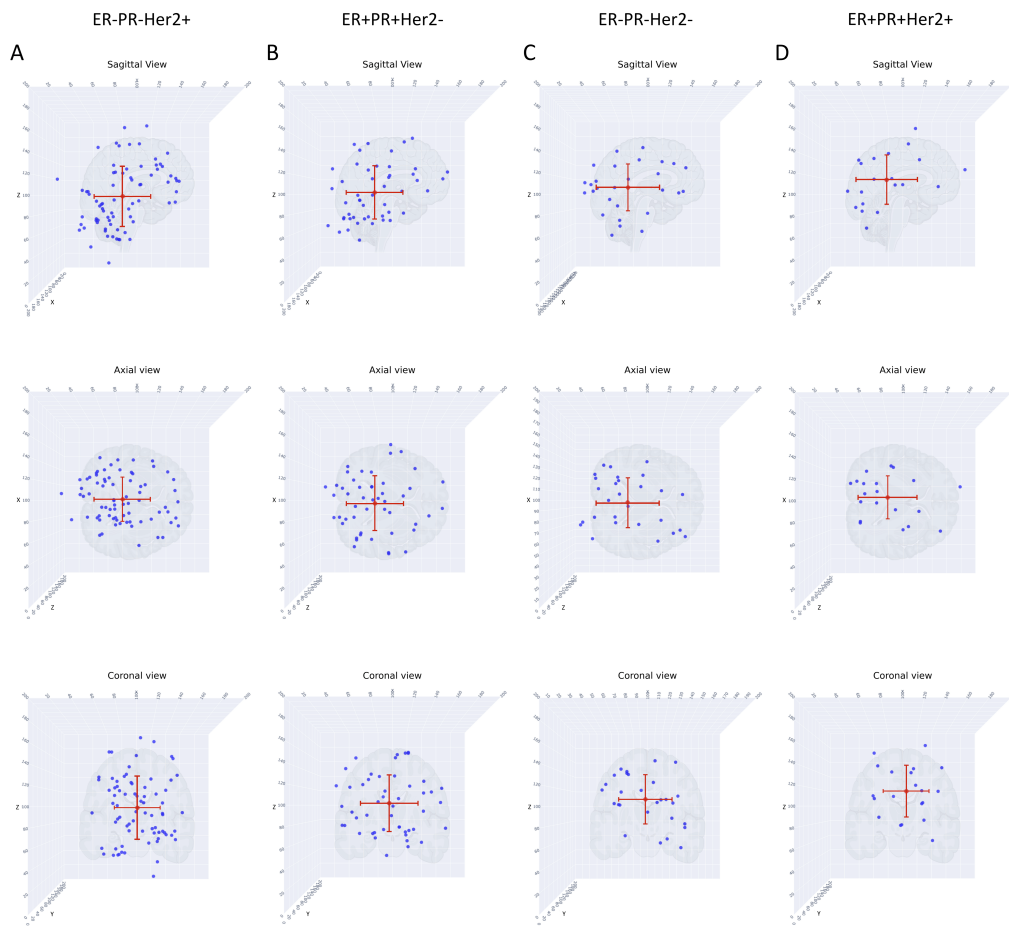

Fig. S2. Scatter plots of metastatic tumor distributions according to genetic subgroups, sagittal, axial, and coronal views. Red dot indicates mean. A) Column showing ER-/PR-/Her2+ subgroup, three views; B) Column showing ER+/PR+/Her2- subgroup, three views; C) Column showing TNBC subgroup, three views; D) Column showing TPBC subgroup, three views.

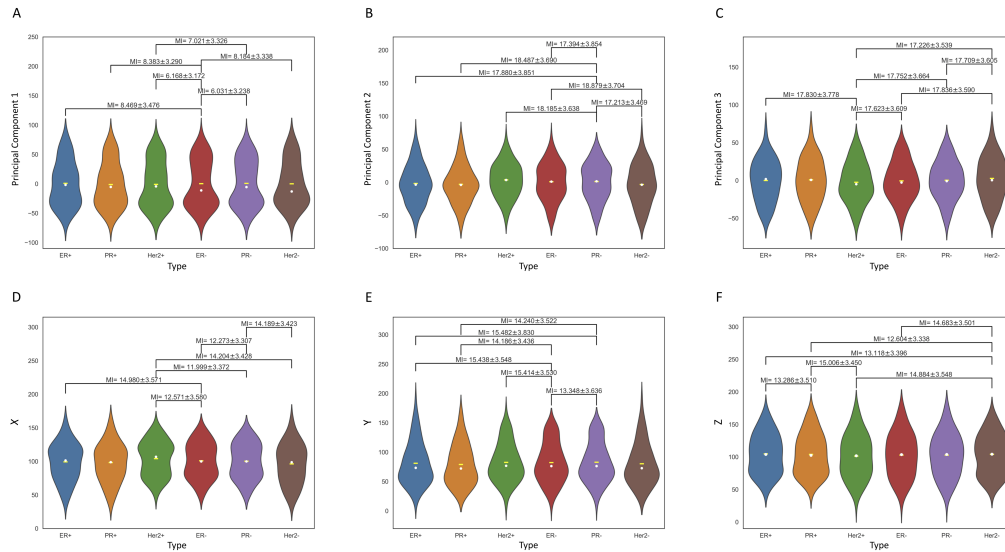

Fig. S3. Violin plots (probability distribution functions) of metastatic distributions according to molecular subtype (indicated by color), comparing distributions in original Cartesian X-Y-Z coordinates, and Principal component coordinates (PC1-PC2-PC3). MI metric is shown for each pair. A) Distribution along PC1-axis according to molecular subtype. Yellow dash indicates mean, white dot indicates median; B) Distribution along PC2-axis according to subtype. Yellow dash indicates mean, white dot indicates median; C) Distribution along PC3-axis according to subtype. Yellow dash indicates mean, white dot indicates median; D) Distribution along X-axis according to molecular subtype. Yellow dash indicates mean, white dot indicates median. We use this representation to arrange the subtypes from left to right in order of increasing divergence between the means and medians; E) Distribution along Y-axis according to molecular subtype. Yellow dash indicates mean, white dot indicates median; F) Distribution along Z-axis according to molecular subtype. Yellow dash indicates mean, white dot indicates median.

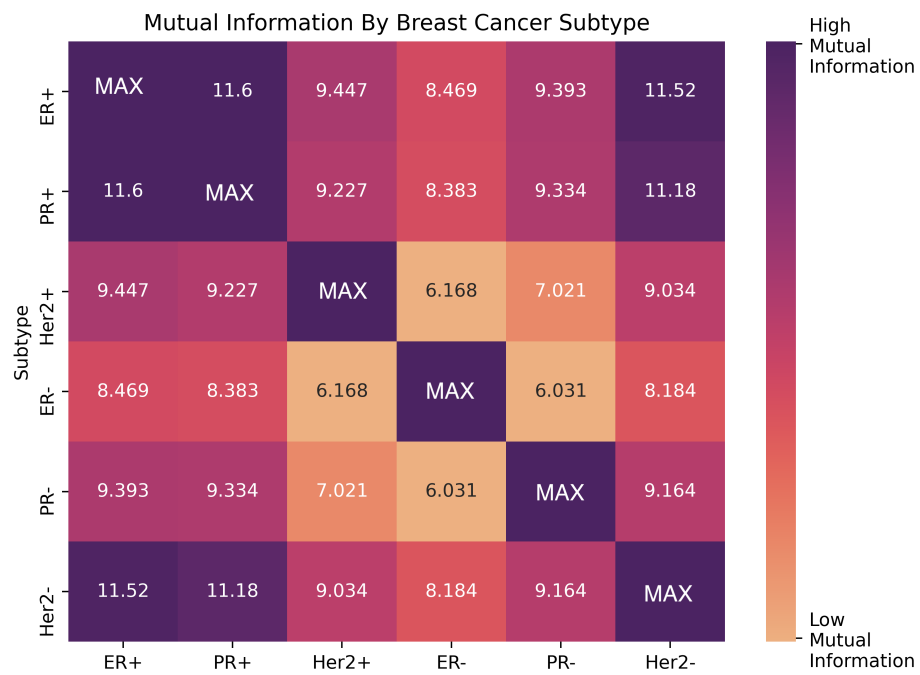

Fig. S4. Mutual information heat map for the six breast cancer molecular subtypes along PC1-axis. Low mutual information indicates the distributions associated with the two subtypes are not highly dependent. High mutual information indicates the distributions associated with the two subtypes are highly dependent.

| ER | PR | Her2/Neu | No. Metastases | Anterior  | Lateral | Median X | Median Y | Median Z | Median   | Median   | Median   |
|----|----|----------|----------------|-----------|---------|----------|----------|----------|----------|----------|----------|
|    |    |          |                | :         | :       |          |          |          |          |          |          |
|    |    |          |                | Posterior | :       | Axis     | Axis     | Axis     | PC1 Axis | PC2 Axis | PC3 Axis |
|    |    |          |                | Watershed | Medial  |          |          |          |          |          |          |
| +  |    |          | 110            | 28:42:40  | 25:85   | 101.35   | 73.30    | 103.85   | -3.13    | 0.12     | 2.98     |
| -  |    |          | 116            | 31:56:29  | 21:95   | 99.90    | 76.30    | 103.60   | -10.56   | -1.05    | 2.80     |
|    | +  |          | 86             | 19:35:32  | 21:65   | 98.85    | 72.15    | 102.45   | -3.42    | -0.35    | 1.02     |
|    | -  |          | 124            | 32:57:35  | 23:101  | 99.90    | 76.30    | 103.85   | -4.93    | -1.13    | 1.64     |
|    |    | +        | 124            | 27:60:37  | 22:102  | 106.80   | 76.80    | 101.80   | -2.56    | -0.77    | 1.74     |
|    |    | -        | 91             | 23:37:31  | 25:66   | 98.70    | 72.70    | 104.20   | -9.31    | 0.55     | -0.33    |
| +  | +  | +        | 20             | 4:8:8     | 3:17    | 110.25   | 69.35    | 114.30   | -2.91    | -1.08    | -7.26    |
| +  | +  | -        | 49             | 10:20:19  | 16:33   | 100.4    | 73.90    | 99.1     | -3.98    | 1.19     | -2.01    |
| -  | -  | +        | 75             | 17:40:18  | 12:63   | 99.60    | 77.90    | 93.90    | -9.56    | 0.28     | 2.25     |
| -  | -  | -        | 28             | 8:11:9    | 7:21    | 103.45   | 66.20    | 107.15   | -12.98   | -0.58    | -1.04    |
| +  | -  | +        | 8              |           |         |          |          |          |          |          |          |
| -  | +  | +        | 4              |           |         |          |          |          |          |          |          |
| +  | -  | -        | 5              |           |         |          |          |          |          |          |          |
| -  | +  | -        | 2              |           |         |          |          |          |          |          |          |

Table S1. Number of brain metastases and proportion of different spatial subgroupings along with the medians in Cartesian and Principal Component coordinates by tumor subtype. The last four molecular subgroupings (last four rows) are not considered in this paper due to the small number of data points.

|                              | PC1            | PC2            | PC3            | X              | Y              | Z              |
|------------------------------|----------------|----------------|----------------|----------------|----------------|----------------|
| ER-PR-Her2+/<br>ER-PR-Her2-  | 8.966 ± 3.394  | 15.508 ± 3.330 | 16.350 ± 3.655 | 13.023 ± 3.466 | 15.548 ± 3.648 | 16.878 ± 3.600 |
| ER+PR+Her2-/<br>ER-PR-Her2+  | 10.767 ± 3.443 | 17.467 ± 3.496 | 18.515 ± 3.801 | 15.805 ± 3.457 | 17.472 ± 3.694 | 15.132 ± 3.532 |
| ER+PR+Her2+ /<br>ER-PR-Her2+ | 10.979 ± 3.376 | 17.392 ± 3.667 | 21.222 ± 3.881 | 14.446 ± 3.645 | 17.146 ± 3.745 | 18.476 ± 3.658 |
| ER+PR+Her2-/<br>ER-PR-Her2-  | 12.540 ± 3.527 | 15.359 ± 3.531 | 16.221 ± 3.548 | 14.470 ± 3.536 | 16.200 ± 3.607 | 14.571 ± 3.503 |
| ER+PR+Her2+/<br>ER-PR-Her2-  | 12.614 ± 3.376 | 15.249 ± 3.606 | 18.921 ± 3.789 | 13.100 ± 3.613 | 16.029 ± 3.504 | 18.112 ± 3.677 |
| ER+PR+Her2+ /<br>ER+PR+Her2- | 14.808 ± 3.589 | 17.018 ± 3.530 | 20.996 ± 3.820 | 16.014 ± 3.547 | 18.158 ± 3.645 | 16.247 ± 3.766 |
| PR- / ER-                    | 6.031 ± 3.238  | 17.394 ± 3.854 | 17.993 ± 3.653 | 12.273 ± 3.307 | 13.348 ± 3.636 | 17.442 ± 3.644 |
| Her2+ / ER-                  | 6.168 ± 3.172  | 19.844 ± 3.765 | 17.623 ± 3.609 | 12.571 ± 3.580 | 15.414 ± 3.530 | 17.102 ± 3.598 |
| Her2+ / PR-                  | 7.021 ± 3.326  | 18.185 ± 3.638 | 17.752 ± 3.664 | 11.999 ± 3.372 | 15.715 ± 3.678 | 17.683 ± 3.720 |
| Her2- / ER-                  | 8.184 ± 3.338  | 18.879 ± 3.704 | 17.836 ± 3.590 | 14.506 ± 3.569 | 16.038 ± 3.762 | 14.683 ± 3.501 |
| PR+ / ER-                    | 8.383 ± 3.290  | 20.139 ± 3.885 | 18.164 ± 3.536 | 15.609 ± 3.565 | 14.186 ± 3.436 | 15.196 ± 3.607 |
| ER+ / ER-                    | 8.469 ± 3.476  | 19.238 ± 3.652 | 17.926 ± 3.622 | 15.484 ± 3.515 | 15.438 ± 3.548 | 15.482 ± 3.679 |
| Her2+ / Her2-                | 9.034 ± 3.363  | 19.914 ± 3.792 | 17.226 ± 3.539 | 14.204 ± 3.428 | 18.322 ± 3.758 | 14.884 ± 3.548 |
| PR- / Her2-                  | 9.164 ± 3.319  | 17.213 ± 3.469 | 17.709 ± 3.605 | 14.189 ± 3.423 | 15.927 ± 3.691 | 15.359 ± 3.520 |
| Her2+ / PR+                  | 9.227 ± 3.452  | 21.094 ± 3.730 | 18.118 ± 3.514 | 15.350 ± 3.506 | 16.584 ± 3.661 | 15.006 ± 3.450 |
| PR+ / PR-                    | 9.334 ± 3.323  | 18.487 ± 3.690 | 18.253 ± 3.550 | 15.325 ± 3.542 | 14.24 ± 3.522  | 15.662 ± 3.541 |
| ER+ / PR-                    | 9.393 ± 3.582  | 17.88 ± 3.851  | 18.09 ± 3.490  | 14.980 ± 3.571 | 15.482 ± 3.830 | 16.098 ± 3.715 |
| Her2+ / ER+                  | 9.447 ± 3.351  | 20.288 ± 3.861 | 17.830 ± 3.778 | 15.093 ± 3.558 | 17.836 ± 3.753 | 15.588 ± 3.586 |
| PR+ / Her2-                  | 11.178 ± 3.466 | 20.357 ± 3.804 | 17.978 ± 3.604 | 17.838 ± 3.564 | 16.798 ± 3.715 | 12.604 ± 3.338 |
| ER+ / Her2-                  | 11.516 ± 3.469 | 19.579 ± 3.714 | 17.827 ± 3.669 | 17.216 ± 3.831 | 18.183 ± 3.745 | 13.118 ± 3.396 |
| ER+ / PR+                    | 11.601 ± 3.455 | 20.712 ± 3.723 | 18.224 ± 3.532 | 18.455 ± 3.691 | 16.696 ± 3.625 | 13.286 ± 3.510 |

Table S2. Mutual Information. Ranked listing (from smallest to largest) of MI between pairs of molecular subtypes along each of the coordinate axes, using the PC1 coordinate axis values to order the list. Smaller MI values indicate weaker mutual dependence (i.e. more independence), larger MI values indicate stronger mutual dependence.
